# Supplementary material for: Comparative analysis of twelve mitogenomes of Caliscelidae (Hemiptera: Fulgoromorpha) and their phylogenetic implications
Source: PeerJ journal article supplement (doi:10.7717/peerj.12465), 2021-11-16
Supplement: supplementary_materials_-figure_and_table.zip [file supplementary_materials_-figure_and_table.zip]

## Sheet: Table S1
Table S1 Mitogenomes used in this study
Superfamily	Family	Species	Access number
Fulgoroidea	Caliscelidae	Augilina tetraina	MW928529
Fulgoroidea	Caliscelidae	Augilina triaina	MW928528
Fulgoroidea	Caliscelidae	Symplana brevistrata	MW550300
Fulgoroidea	Caliscelidae	Symplana lii	MW550301
Fulgoroidea	Caliscelidae	Neosymplana vittatum	MT577030
Fulgoroidea	Caliscelidae	Pseudosymplanella nigrifasciata	MW928527
Fulgoroidea	Caliscelidae	Symplanella brevicephala	MW550299
Fulgoroidea	Caliscelidae	Symplanella unipuncta	MZ343195
Fulgoroidea	Caliscelidae	Augilodes binghami	MW928526
Fulgoroidea	Caliscelidae	Bambusicaliscelis ﬂavus	MW281858
Fulgoroidea	Caliscelidae	Bambusicaliscelis fanjingensis	MW281859
Fulgoroidea	Caliscelidae	Youtuus strigatus	MW281860
Fulgoroidea	Caliscelidae	Youtuus erythrus	MW281861
Fulgoroidea	Caliscelidae	Cylindratus longicephalus	MW928525
Fulgoroidea	Caliscelidae	Caliscelis shandongensis	MZ343194
Fulgoroidea	Caliscelidae	Peltonotellus sp.	MW928530
Fulgoroidea	Ricaniidae	Ricania marginalis	NC019597
Fulgoroidea	Ricaniidae	Ricania speculum	NC031369
Fulgoroidea	Issidae	Sivaloka damnosus	NC014286
Fulgoroidea	Issidae	Hemisphaerius rufovarius	MT210096
Fulgoroidea	Flatidae	Geisha distinctissima	NC012617

## Sheet: Table S2
Table S2 The partition schemes and best substitution models used in the phylogenetic analysis.
	Genes	Models
Subset1	nd3_condon1, atp6_condon1	GTR+I+G
Subset2	atp6_condon2	TVM+I+G
Subset3	atp6_condon3, cox3_condon3	TRN+I+G
Subset4	nd2_condon1, atp8_condon1	TVM+I+G
Subset5	atp8_condon2	K81UF+G
Subset6	atp8_condon3, nd6_condon3	HKY+G
Subset7	cox1_condon1	GTR+G
Subset8	cox1_condon2	TVM+I+G
Subset9	cytb_condon3, cox1_condon3	TVM+I+G
Subset10	cox3_condon1, cox2_condon1	GTR+I+G
Subset11	cox2_condon2	TVM+I+G
Subset12	cox2_condon3, nd3_condon3	HKY+G
Subset13	cytb_condon2, nd3_condon2, cox3_condon2	GTR+I+G
Subset14	cytb_condon1	GTR+I+G
Subset15	nd1_condon1, nd4_condon1	GTR+I+G
Subset16	nd4l_condon2, nd1_condon2	GTR+G
Subset17	nd4_condon3, nd1_condon3	K81UF+I+G
Subset18	nd2_condon2	TVM+G
Subset19	nd2_condon3	TVM+G
Subset20	nd4_condon2, nd5_condon2	GTR+I+G
Subset21	nd4l_condon1, nd5_condon1	GTR+I+G
Subset22	nd4l_condon3	HKY+I+G
Subset23	nd5_condon3	TRN+G
Subset24	nd6_condon1	GTR+I+G
Subset25	nd6_condon2	TVM+G

## Sheet: Table S3
Table S3 List of total size and intergenic nucleotides for mitochondrial genes of 12 new sequenced species with lengths of genes, anticodons of tRNAs, and start/stop codons of protein-coding genes.
Gene	Augilina tetraina			Augilina triaina			Symplana brevistrata			Symplana lii			Neosymplana vittatum			Pseudosymplanella nigrifasciata			Symplanella brevicephala			Symplanella unipuncta			Augilodes binghami			Cylindratus longicephalus			Caliscelis shandongensis			Peltonotellus sp.
	Size	Anticodons	Int.	Size	Anticodons	Int.	Size	Anticodons	Int.	Size	Anticodons	Int.	Size	Anticodons	Int.	Size	Anticodons	Int.	Size	Anticodons	Int.	Size	Anticodons	Int.	Size	Anticodons	Int.	Size	Anticodons	Int.	Size	Anticodons	Int.	Size	Anticodons	Int.
		Start/Stop			Start/Stop			Start/Stop			Start/Stop			Start/Stop			Start/Stop			Start/Stop			Start/Stop			Start/Stop			Start/Stop			Start/Stop			Start/Stop
trnI	66	ATC		66	ATC		64	ATC		64	ATC		64	ATC		64	ATC		64	ATC		64	ATC		65	ATC		67	ATC		63	ATC		68	ATC
trnQ	69	CAA	1	69	CAA	1	69	CAA	1	69	CAA	1	69	CAA	2	69	CAA	0	69	CAA	-3	69	CAA	2	69	CAA	2	69	CAA	8	70	CAA	2	69	CAA	27
trnM	67	ATG	-1	68	ATG	-1	63	ATG	-1	69	ATG	-2	65	ATG	-1	64	ATG	-1	69	ATG	-1	68	ATG	-1	67	ATG	-1	65	ATG	9	64	ATG	-1	65	ATG	2
nad2	966	ATT/TAA	0	966	ATT/TAA	0	966	ATT/TAA	0	966	ATT/TAA	-1	966	ATT/TAA	0	966	ATT/TAA	0	966	ATT/TAA	0	966	ATT/TAA	0	966	ATT/TAA	0	966	ATT/TAG	0	966	ATT/TAA	0	966	ATT/TAA	0
trnW	66	TGA	0	66	TGA	0	70	TGA	2	70	TGA	-1	66	TGA	0	70	TGA	0	70	TGA	-1	69	TGA	-2	65	TGA	-1	68	TGA	3	69	TGA	-2	69	TGA	-1
trnC	58	TGC	-8	59	TGC	-8	59	TGC	-8	60	TGC	-8	56	TGC	-8	58	TGC	-8	56	TGC	-8	60	TGC	-8	56	TGC	-8	74	TGC	-8	62	TGC	-8	66	TGC	-8
trnY	61	TAC	11	61	TAC	11	61	TAC	11	61	TAC	14	63	TAC	3	61	TAC	3	65	TAC	23	61	TAC	39	62	TAC	1	66	TAC	6	64	TAC	3	66	TAC	6
cox1	1534	ATG/T	5	1534	ATG/T	6	1534	ATG/T	8	1534	ATG/T	8	1534	ATG/T	29	1534	ATG/T	33	1534	ATG/T	8	1534	ATG/T	8	1537	ATG/T	8	1534	ATG/T	27	1537	ATG/T	24	1537	ATG/T	4
trnL2	64	TTA	0	64	TTA	0	64	TTA	0	64	TTA	0	64	TTA	0	64	TTA	0	64	TTA	0	64	TTA	0	63	TTA	5	67	TTA	3	67	TTA	8	68	TTA	0
cox2	675	ATA/TAA	0	675	ATA/TAA	0	678	ATA/TAA	0	678	ATA/TAA	0	678	ATA/TAA	0	678	ATA/TAA	0	675	ATA/TAA	0	678	ATA/TAA	0	675	ATA/TAA	0	681	ATA/TAA	0	675	ATA/TAA	0	678	ATA/TAA	0
trnK	71	AAG	23	71	AAG	16	71	AAG	17	71	AAG	16	71	AAG	11	71	AAG	15	73	AAG	25	71	AAG	30	69	AAG	20	71	AAG	10	71	AAG	1	71	AAG	2
trnD	67	GAC	0	67	GAC	0	68	GAC	0	73	GAC	0	69	GAC	1	70	GAC	0	70	GAC	0	70	GAC	0	68	GAC	0	69	GAC	9	65	GAC	5	68	GAC	5
atp8	153	ATT/TAA	0	153	ATA/TAA	0	153	ATT/TAA	0	159	ATT/TAA	0	156	ATT/TAA	0	153	ATA/TAA	9	159	ATT/TAA	0	156	ATT/TAA	0	153	ATA/TAA	0	156	ATT/TAA	0	153	ATA/TAA	0	153	ATA/TAA	0
atp6	652	ATG/T	-7	652	ATG/T	-7	652	ATG/T	-7	652	ATG/T	-7	652	ATG/T	-7	652	ATG/T	-7	652	ATG/T	-7	652	ATG/T	-7	652	ATG/T	-7	652	ATG/T	-7	658	ATA/T	-1	652	ATG/T	-7
cox3	783	ATG/TAA	0	783	ATG/TAA	0	783	ATG/TAA	0	783	ATG/TAA	0	783	ATG/TAA	0	795	ATG/TAA	0	783	ATG/TAA	0	783	ATG/TAA	0	783	ATG/TAA	0	783	ATG/TAA	0	783	ATG/TAA	5	783	ATG/TAA	0
trnG	62	GGA	9	63	GGA	-1	61	GGA	-1	61	GGA	-1	61	GGA	5	62	GGA	5	61	GGA	-1	64	GGA	-2	61	GGA	0	66	GGA	6	64	GGA	3	63	GGA	3
nad3	348	ATA/TAA	0	348	ATA/TAA	0	348	ATC/TAA	0	348	ATC/TAA	0	348	ATT/TAG	0	348	ATT/TAG	0	348	ATT/TAA	0	348	ATT/TAA	0	348	ATA/TAA	0	351	ATA/TAA	0	351	ATA/TAG	0	348	ATA/TAA	0
trnA	65	GCA	-1	65	GCA	-1	65	GCA	4	64	GCA	4	66	GCA	-2	63	GCA	-2	65	GCA	2	65	GCA	0	67	GCA	12	69	GCA	9	64	GCA	-2	69	GCA	5
trnR	71	CGA	1	62	CGA	0	62	CGA	0	61	CGA	0	57	CGA	6	62	CGA	0	63	CGA	1	66	CGA	0	63	CGA	15	63	CGA	15	64	CGA	-2	61	CGA	11
trnN	65	AAC	-2	68	AAC	6	62	AAC	7	65	AAC	6	64	AAC	2	64	AAC	6	62	AAC	10	63	AAC	5	63	AAC	6	67	AAC	3	63	AAC	3	65	AAC	9
trnS1	58	AGC	-1	59	AGC	-1	58	AGC	0	58	AGC	-1	59	AGC	-1	59	AGC	-1	58	AGC	-2	59	AGC	-1	61	AGC	-3	63	AGC	1	59	AGC	-1	60	AGC	-1
trnE	67	GAA	0	67	GAA	0	67	GAA	1	68	GAA	0	62	GAA	6	64	GAA	2	62	GAA	32	64	GAA	9	64	GAA	-1	65	GAA	7	63	GAA	1	65	GAA	-1
trnF	66	TTC	4	68	TTC	8	71	TTC	3	66	TTC	3	70	TTC	50	66	TTC	14	67	TTC	36	69	TTC	34	68	TTC	-1	64	TTC	-2	63	TTC	4	64	TTC	7
nad5	1683	ATT/TAA	25	1677	ATT/TAA	25	1689	ATT/TAG	7	1689	ATT/TAG	3	1677	ATG/TAA	4	1680	ATT/TAA	10	1689	ATT/TAA	3	1671	ATT/TAA	19	1686	ATT/TAA	-1	1689	ATT/TAG	26	1696	ATT/T	5	1692	GTG/TAG	6
trnH	63	CAC	11	62	CAC	16	62	CAC	11	62	CAC	11	66	CAC	-1	62	CAC	16	62	CAC	11	62	CAC	11	63	CAC	16	66	CAC	5	68	CAC	0	61	CAC	1
nad4	1311	ATG/TAA	66	1311	ATG/TAA	27	1314	ATG/TAA	64	1314	ATG/TAA	47	1320	ATG/TAA	2	1314	ATG/TAA	1	1314	ATG/TAA	42	1314	ATG/TAA	46	1317	ATG/TAA	52	1323	ATG/TAG	1	1324	ATG/T	1	1321	ATG/T	1
nad4l	273	ATG/TAA	-7	273	ATG/TAA	-7	273	ATG/TAA	-7	273	ATG/TAA	-7	273	ATG/TAA	-7	273	ATG/TAA	-7	273	ATG/TAA	-7	273	ATG/TAA	-7	273	ATG/TAA	-7	270	ATG/TAA	-7	270	ATG/TAA	-7	270	ATG/TAA	-7
trnT	66	ACA	13	67	ACA	12	74	ACA	11	71	ACA	11	67	ACA	36	70	ACA	32	66	ACA	35	68	ACA	42	65	ACA	18	64	ACA	2	62	ACA	2	64	ACA	2
trnP	64	CCA	14	65	CCA	13	63	CCA	4	64	CCA	3	67	CCA	2	65	CCA	10	66	CCA	5	66	CCA	3	64	CCA	2	62	CCA	17	66	CCA	5	67	CCA	37
nad6	504	ATA/TAA	7	510	ATA/TAA	7	481	ATA/T	10	490	ATA/T	1	483	ATT/TAA	19	495	ATT/TAA	1	490	ATA/T	1	493	ATA/T	1	501	ATC/TAA	1	504	ATA/TAA	1	489	ATC/TAA	1	492	ATA/TAA	1
cytb	1119	ATG/TAA	-8	1119	ATG/TAA	-8	1119	ATG/TAA	0	1119	ATG/TAA	0	1119	ATG/TAA	-8	1119	ATG/TAA	-8	1119	ATG/TAA	0	1128	ATG/TAA	0	1119	ATG/TAA	-8	1140	ATG/TAG	21	1125	ATG/TAA	3	1119	ATG/TAA	-8
trnS2	66	TCA	3	65	TCA	-1	64	TCA	9	65	TCA	9	62	TCA	4	65	TCA	4	65	TCA	17	64	TCA	11	64	TCA	16	68	TCA	-2	65	TCA	8	64	TCA	-1
nad1	936	GTG/TAA	1	939	GTG/TAA	-1	943	ATG/T	10	934	GTG/T	17	942	ATG/TAA	-2	943	ATG/T	3	943	GTG/T	1	943	GTG/T	1	943	ATG/T	-5	934	ATG/T	-1	925	ATG/T	9	939	ATG/TAA	6
trnL1	64	CTA	1	64	CTA	1	62	CTA	1	62	CTA	1	64	CTA	1	62	CTA	1	63	CTA	1	63	CTA	1	65	CTA	1	63	CTA	1	64	CTA	1	67	CTA	1
rrnL	1222	-	0	1222	-	0	1225	-	0	1230	-	0	1222	-	0	1237	-	0	1227	-	0	1225	-	0	1238	-	0	1222	-	4	1205	-	0	1233	-	0
trnV	57	GTA	0	57	GTA	0	57	GTA	0	56	GTA	0	57	GTA	-2	56	GTA	0	58	GTA	0	57	GTA	0	57	GTA	0	59	GTA	0	55	GTA	0	57	GTA	0
rrnS	712	-	0	711	-	0	727	-	0	721	-	0	721	-	0	709	-	0	709	-	0	709	-	0	721	-	0	721	-	0	732	-	0	724	-	0
CR	1206		0	1023		0	1135		0	1179		0	2319		0	986		0	980		0	1164		0	1363		0	1163		0	1063		0	1110		0
Total	15660			15432			15594			15620			16746			15424			15502			15701			15816			15733			15437			15556
Except for A+T-rich region, the italicize genes were encoded by the H-strand, with others by the L-strand. CR: control region/A+T-rich region. Int: the length of the intergenic spacer region, for which negative numbers indicate nucleotide overlapping between adjacent genes.

## Sheet: Table S4
Table S4 Base composition of 12 mitochondrial whole genome, 13 PCGs, 22 tRNAs, 2 rRNAs and Control Region
Regions	Size (bp)	T(U)	C	A	G	A+T(%)	G+C(%)	AT skewness	GC skewness
Full genome
Augilina tetraina	15660	33.6	12.7	45.6	8.1	79.2	20.8	0.152	-0.22
Augilina triaina	15432	33.4	12.9	45.6	8.1	79	21	0.154	-0.229
Symplana brevistrata	15594	33.8	13.1	45.2	7.9	79	21	0.145	-0.245
Symplana lii	15620	32.9	13.1	45.9	8.1	78.8	21.2	0.165	-0.236
Neosymplana vittatum	16746	34	12.3	45.1	8.6	79.1	20.9	0.141	-0.177
Pseudosymplanella nigrifasciata	15424	33.4	13	45.6	8	79	21	0.155	-0.237
Symplanella brevicephala	15502	33.5	12.5	46.1	7.9	79.6	20.4	0.158	-0.225
Symplanella unipuncta	15701	34.3	12.5	45.3	7.8	79.6	20.3	0.138	-0.232
Augilodes binghami	15816	34.9	12.5	44.4	8.2	79.3	20.7	0.119	-0.21
Cylindratus longicephalus	15733	31.4	13.3	48.2	7.2	79.6	20.5	0.211	-0.298
Caliscelis shandongensis	15437	30.3	13.7	48.1	7.9	78.4	21.6	0.227	-0.269
Peltonotellus sp.	15556	31	13.3	48	7.7	79	21	0.215	-0.268
13 PCGs
Augilina tetraina	10937	44.4912	11.5205	33.7753	10.213	78.3	21.7	-0.137	-0.06
Augilina triaina	10940	44.6618	11.2523	33.7203	10.3656	78.4	21.6	-0.14	-0.042
Symplana brevistrata	10933	44.5993	11.5392	33.3971	10.4645	78	22	-0.144	-0.045
Symplana lii	10939	44.0717	11.8749	33.4126	10.6408	77.6	22.4	-0.138	-0.058
Neosymplana vittatum	10931	44.3052	11.4445	33.62	10.6303	77.9	22	-0.137	-0.036
Pseudosymplanella nigrifasciata	10950	44.8219	11.4703	33.2603	10.4475	78.1	21.9	-0.147	-0.05
Symplanella brevicephala	10945	44.5853	11.103	34.2031	10.1086	78.8	21.2	-0.132	-0.047
Symplanella unipuncta	10939	44.5196	11.2716	33.9245	10.2843	78.4	21.6	-0.135	-0.046
Augilodes binghami	10953	45.2387	11.7685	33.0868	9.90596	78.3	21.7	-0.155	-0.088
Cylindratus longicephalus	10983	43.9953	11.5906	34.2711	10.1429	78.3	21.7	-0.124	-0.069
Caliscelis shandongensis	10952	43.6267	11.9522	33.8842	10.5369	77.5	22.5	-0.125	-0.067
Peltonotellus sp.	10950	44.0822	11.2968	34.4749	10.1461	78.6	21.4	-0.122	-0.056
2 rRNAs
Augilina tetraina	1934	46.6	7.3	33.5	12.6	80.1	19.9	-0.165	0.268
Augilina triaina	1933	46	7.4	33.2	13.3	79.2	20.7	-0.162	0.287
Symplana brevistrata	1952	46.8	6.9	33.2	13.1	80	20	-0.17	0.308
Symplana lii	1951	47.9	7	32.1	13	80	20	-0.198	0.299
Neosymplana vittatum	1943	46.8	7.1	34.1	12	80.9	19.1	-0.158	0.256
Pseudosymplanella nigrifasciata	1946	47	6.9	33.2	12.8	80.2	19.7	-0.172	0.302
Symplanella brevicephala	1936	46.7	7.2	32.9	13.2	79.6	20.4	-0.175	0.296
Symplanella unipuncta	1934	46.4	7.2	33.1	13.2	79.5	20.4	-0.168	0.293
Augilodes binghami	1959	45.2	7.2	34.9	12.7	80.1	19.9	-0.129	0.275
Cylindratus longicephalus	1943	48.4	6.3	32.2	13.2	80.6	19.5	-0.201	0.354
Caliscelis shandongensis	1937	47.8	7.4	31.2	13.6	79	21	-0.21	0.294
Peltonotellus sp.	1957	47.9	7.3	32.4	12.5	80.3	19.8	-0.193	0.264
22 tRNAs
Augilina tetraina	1423	38.3696	8.78426	40.759	12.0871	79.2	20.8	0.03	0.159
Augilina triaina	1423	38.2994	9.13563	40.759	11.806	79.1	20.9	0.32	0.129
Symplana brevistrata	1417	38.4615	9.17431	40.0847	12.2795	78.5	21.5	0.02	0.144
Symplana lii	1424	38.3427	9.05899	40.5899	12.0084	78.9	21.1	0.029	0.137
Neosymplana vittatum	1409	38.1831	8.94251	40.8801	11.9943	79.1	20.9	0.034	0.148
Pseudosymplanella nigrifasciata	1411	38.1999	9.21332	40.6095	11.9773	78.8	21.2	0.03	0.132
Symplanella brevicephala	1418	37.6587	9.0268	41.1848	12.1298	78.9	21.1	0.044	0.147
Symplanella unipuncta	1426	38.4993	9.11641	40.0421	12.3422	78.5	21.4	0.019	0.149
Augilodes binghami	1409	38.3251	9.58126	39.6026	12.4911	77.9	22.1	0.167	0.131
Cylindratus longicephalus	1455	38.0756	8.31615	42.6117	10.9966	80.7	19.3	0.56	0.14
Caliscelis shandongensis	1415	36.7491	9.68198	41.0601	12.5088	77.8	22.2	0.057	0.126
Peltonotellus sp.	1437	37.7871	8.97704	41.1273	12.1086	78.9	21.1	0.042	0.147
CR
Augilina tetraina	1206	41.5	8.7	43.1	6.7	84.6	15.4	0.019	-0.13
Augilina triaina	1023	41.1	9.4	42.4	7.1	83.5	16.5	0.156	-0.139
Symplana brevistrata	1135	43.5	8.6	41.9	5.9	85.4	14.5	-0.022	-0.186
Symplana lii	1179	43.8	7.6	43.9	4.7	87.7	12.3	0.001	-0.236
Neosymplana vittatum	2319	40.5	10.2	41.3	7.9	81.8	18.2	0.009	-0.126
Pseudosymplanella nigrifasciata	986	42.1	8.4	43	6.5	85.1	14.9	0.011	-0.128
Symplanella brevicephala	980	43.8	8.8	42.9	4.6	86.6	13.4	-0.01	-0.313
Symplanella unipuncta	1164	46.1	5.8	43	5	89.1	10.8	-0.035	-0.074
Augilodes binghami	1363	44.6	8.9	41.5	5.1	86.1	13.9	-0.036	-0.273
Cylindratus longicephalus	1163	40.9	9.1	45.8	4.1	86.7	13.2	0.057	-0.38
Caliscelis shandongensis	1063	38.8	8.9	46.8	5.5	85.6	14.4	0.093	-0.236
Peltonotellus sp.	1110	37.1	14.5	43.1	5.3	80.2	19.8	0.075	-0.464

## Sheet: Table S5
Table S5 Codon number and RSCU in the 12 mitochondrial PCGs.
A: Augilina tetraina
Codon	Count	RSCU	Codon	Count	RSCU	Codon	Count	RSCU	Codon	Count	RSCU
UUU(F)	418	1.86	UCU(S)	109	2.41	UAU(Y)	133	1.66	UGU(C)	49	1.88
UUC(F)	32	0.14	UCC(S)	9	0.2	UAC(Y)	27	0.34	UGC(C)	3	0.12
UUA(L)	332	4.26	UCA(S)	155	3.43	UAA(*)	11	2	UGA(W)	79	1.9
UUG(L)	40	0.51	UCG(S)	4	0.09	UAG(*)	0	0	UGG(W)	4	0.1
CUU(L)	52	0.67	CCU(P)	48	1.54	CAU(H)	44	1.33	CGU(R)	19	1.65
CUC(L)	3	0.04	CCC(P)	18	0.58	CAC(H)	22	0.67	CGC(R)	1	0.09
CUA(L)	38	0.49	CCA(P)	56	1.79	CAA(Q)	45	1.7	CGA(R)	24	2.09
CUG(L)	3	0.04	CCG(P)	3	0.1	CAG(Q)	8	0.3	CGG(R)	2	0.17
AUU(I)	374	1.82	ACU(T)	62	1.43	AAU(N)	139	1.65	AGU(S)	20	0.44
AUC(I)	37	0.18	ACC(T)	13	0.3	AAC(N)	29	0.35	AGC(S)	3	0.07
AUA(M)	282	1.8	ACA(T)	97	2.24	AAA(K)	160	1.84	AGA(S)	62	1.37
AUG(M)	31	0.2	ACG(T)	1	0.02	AAG(K)	14	0.16	AGG(S)	0	0
GUU(V)	67	2.16	GCU(A)	32	1.68	GAU(D)	48	1.6	GGU(G)	79	1.76
GUC(V)	1	0.03	GCC(A)	7	0.37	GAC(D)	12	0.4	GGC(G)	6	0.13
GUA(V)	50	1.61	GCA(A)	35	1.84	GAA(E)	81	1.8	GGA(G)	81	1.8
GUG(V)	6	0.19	GCG(A)	2	0.11	GAG(E)	9	0.2	GGG(G)	14	0.31
Average# codons=3645
B: Augilina triaina
Codon	Count	RSCU	Codon	Count	RSCU	Codon	Count	RSCU	Codon	Count	RSCU
UUU(F)	431	1.83	UCU(S)	95	2.1	UAU(Y)	129	1.7	UGU(C)	50	1.89
UUC(F)	39	0.17	UCC(S)	9	0.2	UAC(Y)	23	0.3	UGC(C)	3	0.11
UUA(L)	329	4.26	UCA(S)	157	3.47	UAA(*)	11	2	UGA(W)	80	1.9
UUG(L)	43	0.56	UCG(S)	5	0.11	UAG(*)	0	0	UGG(W)	4	0.1
CUU(L)	46	0.6	CCU(P)	53	1.67	CAU(H)	52	1.55	CGU(R)	20	1.7
CUC(L)	2	0.03	CCC(P)	12	0.38	CAC(H)	15	0.45	CGC(R)	0	0
CUA(L)	39	0.51	CCA(P)	59	1.86	CAA(Q)	46	1.84	CGA(R)	27	2.3
CUG(L)	4	0.05	CCG(P)	3	0.09	CAG(Q)	4	0.16	CGG(R)	0	0
AUU(I)	375	1.82	ACU(T)	56	1.32	AAU(N)	143	1.64	AGU(S)	23	0.51
AUC(I)	37	0.18	ACC(T)	13	0.31	AAC(N)	31	0.36	AGC(S)	2	0.04
AUA(M)	278	1.84	ACA(T)	101	2.38	AAA(K)	154	1.84	AGA(S)	67	1.48
AUG(M)	24	0.16	ACG(T)	0	0	AAG(K)	13	0.16	AGG(S)	4	0.09
GUU(V)	66	2.08	GCU(A)	36	1.87	GAU(D)	47	1.71	GGU(G)	80	1.74
GUC(V)	2	0.06	GCC(A)	7	0.36	GAC(D)	8	0.29	GGC(G)	6	0.13
GUA(V)	53	1.67	GCA(A)	34	1.77	GAA(E)	86	1.87	GGA(G)	79	1.72
GUG(V)	6	0.19	GCG(A)	0	0	GAG(E)	6	0.13	GGG(G)	19	0.41
Average# codons=3646
C: Symplana brevistrata
Codon	Count	RSCU	Codon	Count	RSCU	Codon	Count	RSCU	Codon	Count	RSCU
UUU(F)	446	1.87	UCU(S)	107	2.23	UAU(Y)	131	1.74	UGU(C)	48	1.88
UUC(F)	30	0.13	UCC(S)	14	0.29	UAC(Y)	20	0.26	UGC(C)	3	0.12
UUA(L)	318	4.15	UCA(S)	160	3.33	UAA(*)	8	1.78	UGA(W)	78	1.88
UUG(L)	40	0.52	UCG(S)	4	0.08	UAG(*)	1	0.22	UGG(W)	5	0.12
CUU(L)	45	0.59	CCU(P)	48	1.55	CAU(H)	43	1.32	CGU(R)	18	1.53
CUC(L)	3	0.04	CCC(P)	11	0.35	CAC(H)	22	0.68	CGC(R)	0	0
CUA(L)	47	0.61	CCA(P)	65	2.1	CAA(Q)	45	1.8	CGA(R)	27	2.3
CUG(L)	7	0.09	CCG(P)	0	0	CAG(Q)	5	0.2	CGG(R)	2	0.17
AUU(I)	354	1.82	ACU(T)	57	1.29	AAU(N)	142	1.66	AGU(S)	23	0.48
AUC(I)	36	0.18	ACC(T)	18	0.41	AAC(N)	29	0.34	AGC(S)	4	0.08
AUA(M)	267	1.79	ACA(T)	100	2.26	AAA(K)	155	1.88	AGA(S)	66	1.38
AUG(M)	31	0.21	ACG(T)	2	0.05	AAG(K)	10	0.12	AGG(S)	6	0.12
GUU(V)	72	1.99	GCU(A)	35	1.94	GAU(D)	46	1.53	GGU(G)	77	1.73
GUC(V)	5	0.14	GCC(A)	5	0.28	GAC(D)	14	0.47	GGC(G)	3	0.07
GUA(V)	60	1.66	GCA(A)	32	1.78	GAA(E)	80	1.84	GGA(G)	81	1.82
GUG(V)	8	0.22	GCG(A)	0	0	GAG(E)	7	0.16	GGG(G)	17	0.38
Average# codons=3643
D: Symplana lii
Codon	Count	RSCU	Codon	Count	RSCU	Codon	Count	RSCU	Codon	Count	RSCU
UUU(F)	430	1.84	UCU(S)	106	2.23	UAU(Y)	114	1.61	UGU(C)	49	1.88
UUC(F)	38	0.16	UCC(S)	9	0.19	UAC(Y)	28	0.39	UGC(C)	3	0.12
UUA(L)	306	3.97	UCA(S)	165	3.47	UAA(*)	8	1.78	UGA(W)	73	1.8
UUG(L)	43	0.56	UCG(S)	1	0.02	UAG(*)	1	0.22	UGG(W)	8	0.2
CUU(L)	47	0.61	CCU(P)	40	1.32	CAU(H)	50	1.59	CGU(R)	17	1.45
CUC(L)	2	0.03	CCC(P)	16	0.53	CAC(H)	13	0.41	CGC(R)	0	0
CUA(L)	61	0.79	CCA(P)	60	1.98	CAA(Q)	45	1.84	CGA(R)	27	2.3
CUG(L)	4	0.05	CCG(P)	5	0.17	CAG(Q)	4	0.16	CGG(R)	3	0.26
AUU(I)	339	1.75	ACU(T)	52	1.18	AAU(N)	142	1.72	AGU(S)	27	0.57
AUC(I)	48	0.25	ACC(T)	17	0.39	AAC(N)	23	0.28	AGC(S)	3	0.06
AUA(M)	264	1.8	ACA(T)	105	2.39	AAA(K)	131	1.74	AGA(S)	64	1.35
AUG(M)	30	0.2	ACG(T)	2	0.05	AAG(K)	20	0.26	AGG(S)	5	0.11
GUU(V)	74	2.06	GCU(A)	26	1.33	GAU(D)	44	1.49	GGU(G)	75	1.69
GUC(V)	1	0.03	GCC(A)	11	0.56	GAC(D)	15	0.51	GGC(G)	4	0.09
GUA(V)	60	1.67	GCA(A)	40	2.05	GAA(E)	81	1.86	GGA(G)	85	1.92
GUG(V)	9	0.25	GCG(A)	1	0.05	GAG(E)	6	0.14	GGG(G)	13	0.29
Average# codons=3593
E: Neosymplana vittatum
Codon	Count	RSCU	Codon	Count	RSCU	Codon	Count	RSCU	Codon	Count	RSCU
UUU(F)	439	1.86	UCU(S)	99	2.08	UAU(Y)	121	1.65	UGU(C)	47	1.81
UUC(F)	34	0.14	UCC(S)	21	0.44	UAC(Y)	26	0.35	UGC(C)	5	0.19
UUA(L)	312	4.26	UCA(S)	149	3.13	UAA(*)	10	1.82	UGA(W)	74	1.78
UUG(L)	33	0.45	UCG(S)	7	0.15	UAG(*)	1	0.18	UGG(W)	9	0.22
CUU(L)	55	0.75	CCU(P)	55	1.8	CAU(H)	41	1.32	CGU(R)	17	1.45
CUC(L)	4	0.05	CCC(P)	19	0.62	CAC(H)	21	0.68	CGC(R)	1	0.09
CUA(L)	29	0.4	CCA(P)	44	1.44	CAA(Q)	44	1.73	CGA(R)	28	2.38
CUG(L)	6	0.08	CCG(P)	4	0.13	CAG(Q)	7	0.27	CGG(R)	1	0.09
AUU(I)	376	1.83	ACU(T)	53	1.28	AAU(N)	152	1.71	AGU(S)	14	0.29
AUC(I)	35	0.17	ACC(T)	15	0.36	AAC(N)	26	0.29	AGC(S)	1	0.02
AUA(M)	287	1.82	ACA(T)	94	2.27	AAA(K)	138	1.7	AGA(S)	84	1.76
AUG(M)	29	0.18	ACG(T)	4	0.1	AAG(K)	24	0.3	AGG(S)	6	0.13
GUU(V)	65	1.78	GCU(A)	26	1.39	GAU(D)	43	1.51	GGU(G)	66	1.47
GUC(V)	1	0.03	GCC(A)	8	0.43	GAC(D)	14	0.49	GGC(G)	5	0.11
GUA(V)	75	2.05	GCA(A)	41	2.19	GAA(E)	79	1.88	GGA(G)	97	2.16
GUG(V)	5	0.14	GCG(A)	0	0	GAG(E)	5	0.12	GGG(G)	12	0.27
Average# codons=3643
F: Pseudosymplanella nigrifasciata
Codon	Count	RSCU	Codon	Count	RSCU	Codon	Count	RSCU	Codon	Count	RSCU
UUU(F)	444	1.86	UCU(S)	122	2.5	UAU(Y)	144	1.8	UGU(C)	50	1.96
UUC(F)	33	0.14	UCC(S)	19	0.39	UAC(Y)	16	0.2	UGC(C)	1	0.04
UUA(L)	314	4.18	UCA(S)	140	2.87	UAA(*)	9	1.8	UGA(W)	78	1.9
UUG(L)	36	0.48	UCG(S)	4	0.08	UAG(*)	1	0.2	UGG(W)	4	0.1
CUU(L)	54	0.72	CCU(P)	44	1.44	CAU(H)	42	1.35	CGU(R)	17	1.45
CUC(L)	6	0.08	CCC(P)	18	0.59	CAC(H)	20	0.65	CGC(R)	1	0.09
CUA(L)	39	0.52	CCA(P)	58	1.9	CAA(Q)	44	1.69	CGA(R)	28	2.38
CUG(L)	2	0.03	CCG(P)	2	0.07	CAG(Q)	8	0.31	CGG(R)	1	0.09
AUU(I)	372	1.83	ACU(T)	61	1.49	AAU(N)	131	1.58	AGU(S)	16	0.33
AUC(I)	35	0.17	ACC(T)	11	0.27	AAC(N)	35	0.42	AGC(S)	2	0.04
AUA(M)	280	1.84	ACA(T)	88	2.15	AAA(K)	150	1.81	AGA(S)	79	1.62
AUG(M)	24	0.16	ACG(T)	4	0.1	AAG(K)	16	0.19	AGG(S)	8	0.16
GUU(V)	68	2	GCU(A)	29	1.49	GAU(D)	47	1.62	GGU(G)	74	1.67
GUC(V)	3	0.09	GCC(A)	8	0.41	GAC(D)	11	0.38	GGC(G)	4	0.09
GUA(V)	59	1.74	GCA(A)	38	1.95	GAA(E)	75	1.69	GGA(G)	88	1.99
GUG(V)	6	0.18	GCG(A)	3	0.15	GAG(E)	14	0.31	GGG(G)	11	0.25
Average# codons=3649
G: Symplanella brevicephala
Codon	Count	RSCU	Codon	Count	RSCU	Codon	Count	RSCU	Codon	Count	RSCU
UUU(F)	440	1.87	UCU(S)	110	2.42	UAU(Y)	124	1.71	UGU(C)	51	1.85
UUC(F)	30	0.13	UCC(S)	9	0.2	UAC(Y)	21	0.29	UGC(C)	4	0.15
UUA(L)	343	4.47	UCA(S)	146	3.22	UAA(*)	9	2	UGA(W)	81	1.88
UUG(L)	23	0.3	UCG(S)	1	0.02	UAG(*)	0	0	UGG(W)	5	0.12
CUU(L)	49	0.64	CCU(P)	51	1.69	CAU(H)	46	1.39	CGU(R)	16	1.36
CUC(L)	3	0.04	CCC(P)	11	0.36	CAC(H)	20	0.61	CGC(R)	0	0
CUA(L)	38	0.5	CCA(P)	57	1.88	CAA(Q)	50	1.85	CGA(R)	29	2.47
CUG(L)	4	0.05	CCG(P)	2	0.07	CAG(Q)	4	0.15	CGG(R)	2	0.17
AUU(I)	374	1.84	ACU(T)	62	1.42	AAU(N)	152	1.72	AGU(S)	26	0.57
AUC(I)	33	0.16	ACC(T)	11	0.25	AAC(N)	25	0.28	AGC(S)	2	0.04
AUA(M)	285	1.86	ACA(T)	101	2.31	AAA(K)	162	1.88	AGA(S)	67	1.48
AUG(M)	22	0.14	ACG(T)	1	0.02	AAG(K)	10	0.12	AGG(S)	2	0.04
GUU(V)	64	1.92	GCU(A)	27	1.38	GAU(D)	48	1.66	GGU(G)	62	1.39
GUC(V)	3	0.09	GCC(A)	8	0.41	GAC(D)	10	0.34	GGC(G)	5	0.11
GUA(V)	60	1.8	GCA(A)	42	2.15	GAA(E)	78	1.81	GGA(G)	92	2.07
GUG(V)	6	0.18	GCG(A)	1	0.05	GAG(E)	8	0.19	GGG(G)	19	0.43
Average# codons=3647
H: Symplanella unipuncta
Codon	Count	RSCU	Codon	Count	RSCU	Codon	Count	RSCU	Codon	Count	RSCU
UUU(F)	432	1.86	UCU(S)	126	2.73	UAU(Y)	125	1.75	UGU(C)	48	1.88
UUC(F)	33	0.14	UCC(S)	16	0.35	UAC(Y)	18	0.25	UGC(C)	3	0.12
UUA(L)	334	4.32	UCA(S)	129	2.8	UAA(*)	9	2	UGA(W)	79	1.9
UUG(L)	35	0.45	UCG(S)	2	0.04	UAG(*)	0	0	UGG(W)	4	0.1
CUU(L)	54	0.7	CCU(P)	59	1.97	CAU(H)	45	1.41	CGU(R)	20	1.7
CUC(L)	1	0.01	CCC(P)	14	0.47	CAC(H)	19	0.59	CGC(R)	1	0.09
CUA(L)	38	0.49	CCA(P)	47	1.57	CAA(Q)	48	1.75	CGA(R)	26	2.21
CUG(L)	2	0.03	CCG(P)	0	0	CAG(Q)	7	0.25	CGG(R)	0	0
AUU(I)	353	1.76	ACU(T)	60	1.4	AAU(N)	145	1.63	AGU(S)	21	0.46
AUC(I)	47	0.23	ACC(T)	11	0.26	AAC(N)	33	0.37	AGC(S)	1	0.02
AUA(M)	291	1.82	ACA(T)	98	2.29	AAA(K)	157	1.84	AGA(S)	68	1.47
AUG(M)	29	0.18	ACG(T)	2	0.05	AAG(K)	14	0.16	AGG(S)	6	0.13
GUU(V)	61	1.88	GCU(A)	34	1.79	GAU(D)	52	1.79	GGU(G)	59	1.28
GUC(V)	3	0.09	GCC(A)	6	0.32	GAC(D)	6	0.21	GGC(G)	0	0
GUA(V)	64	1.97	GCA(A)	34	1.79	GAA(E)	81	1.86	GGA(G)	107	2.33
GUG(V)	2	0.06	GCG(A)	2	0.11	GAG(E)	6	0.14	GGG(G)	18	0.39
Average# codons=3645
I: Augilodes binghami
Codon	Count	RSCU	Codon	Count	RSCU	Codon	Count	RSCU	Codon	Count	RSCU
UUU(F)	444	1.85	UCU(S)	130	2.69	UAU(Y)	126	1.65	UGU(C)	41	1.78
UUC(F)	35	0.15	UCC(S)	19	0.39	UAC(Y)	27	0.35	UGC(C)	5	0.22
UUA(L)	334	4.24	UCA(S)	131	2.71	UAA(*)	11	1.83	UGA(W)	83	1.93
UUG(L)	33	0.42	UCG(S)	7	0.14	UAG(*)	1	0.17	UGG(W)	3	0.07
CUU(L)	59	0.75	CCU(P)	53	1.75	CAU(H)	39	1.26	CGU(R)	22	1.87
CUC(L)	3	0.04	CCC(P)	22	0.73	CAC(H)	23	0.74	CGC(R)	1	0.09
CUA(L)	39	0.49	CCA(P)	45	1.49	CAA(Q)	53	1.93	CGA(R)	24	2.04
CUG(L)	5	0.06	CCG(P)	1	0.03	CAG(Q)	2	0.07	CGG(R)	0	0
AUU(I)	382	1.8	ACU(T)	52	1.25	AAU(N)	149	1.66	AGU(S)	23	0.48
AUC(I)	43	0.2	ACC(T)	15	0.36	AAC(N)	31	0.34	AGC(S)	1	0.02
AUA(M)	257	1.82	ACA(T)	97	2.32	AAA(K)	156	1.86	AGA(S)	67	1.39
AUG(M)	25	0.18	ACG(T)	3	0.07	AAG(K)	12	0.14	AGG(S)	9	0.19
GUU(V)	55	1.73	GCU(A)	39	2.17	GAU(D)	46	1.61	GGU(G)	78	1.79
GUC(V)	8	0.25	GCC(A)	5	0.28	GAC(D)	11	0.39	GGC(G)	2	0.05
GUA(V)	59	1.86	GCA(A)	28	1.56	GAA(E)	76	1.92	GGA(G)	80	1.84
GUG(V)	5	0.16	GCG(A)	0	0	GAG(E)	3	0.08	GGG(G)	14	0.32
Average# codons=3652
J: Cylindratus longicephalus
Codon	Count	RSCU	Codon	Count	RSCU	Codon	Count	RSCU	Codon	Count	RSCU
UUU(F)	447	1.82	UCU(S)	101	2.2	UAU(Y)	130	1.72	UGU(C)	49	1.92
UUC(F)	45	0.18	UCC(S)	20	0.43	UAC(Y)	21	0.28	UGC(C)	2	0.08
UUA(L)	301	4.16	UCA(S)	144	3.13	UAA(*)	7	1.27	UGA(W)	77	1.93
UUG(L)	51	0.71	UCG(S)	1	0.02	UAG(*)	4	0.73	UGG(W)	3	0.07
CUU(L)	22	0.3	CCU(P)	49	1.66	CAU(H)	47	1.42	CGU(R)	22	1.87
CUC(L)	4	0.06	CCC(P)	23	0.78	CAC(H)	19	0.58	CGC(R)	0	0
CUA(L)	53	0.73	CCA(P)	45	1.53	CAA(Q)	43	1.72	CGA(R)	23	1.96
CUG(L)	3	0.04	CCG(P)	1	0.03	CAG(Q)	7	0.28	CGG(R)	2	0.17
AUU(I)	343	1.72	ACU(T)	54	1.21	AAU(N)	140	1.62	AGU(S)	19	0.41
AUC(I)	56	0.28	ACC(T)	17	0.38	AAC(N)	33	0.38	AGC(S)	1	0.02
AUA(M)	326	1.84	ACA(T)	105	2.35	AAA(K)	160	1.88	AGA(S)	69	1.5
AUG(M)	28	0.16	ACG(T)	3	0.07	AAG(K)	10	0.12	AGG(S)	13	0.28
GUU(V)	54	1.71	GCU(A)	32	1.64	GAU(D)	50	1.61	GGU(G)	64	1.5
GUC(V)	2	0.06	GCC(A)	8	0.41	GAC(D)	12	0.39	GGC(G)	6	0.14
GUA(V)	63	2	GCA(A)	38	1.95	GAA(E)	74	1.83	GGA(G)	96	2.25
GUG(V)	7	0.22	GCG(A)	0	0	GAG(E)	7	0.17	GGG(G)	5	0.12
Average# codons=3661
K: Caliscelis shandongensis
Codon	Count	RSCU	Codon	Count	RSCU	Codon	Count	RSCU	Codon	Count	RSCU
UUU(F)	413	1.78	UCU(S)	98	2.02	UAU(Y)	138	1.68	UGU(C)	43	1.76
UUC(F)	52	0.22	UCC(S)	15	0.31	UAC(Y)	26	0.32	UGC(C)	6	0.24
UUA(L)	263	3.86	UCA(S)	164	3.38	UAA(*)	8	1.78	UGA(W)	69	1.77
UUG(L)	57	0.84	UCG(S)	8	0.16	UAG(*)	1	0.22	UGG(W)	9	0.23
CUU(L)	39	0.57	CCU(P)	42	1.34	CAU(H)	41	1.3	CGU(R)	24	2
CUC(L)	3	0.04	CCC(P)	13	0.42	CAC(H)	22	0.7	CGC(R)	0	0
CUA(L)	46	0.67	CCA(P)	69	2.21	CAA(Q)	47	1.74	CGA(R)	23	1.92
CUG(L)	1	0.01	CCG(P)	1	0.03	CAG(Q)	7	0.26	CGG(R)	1	0.08
AUU(I)	347	1.69	ACU(T)	40	1.01	AAU(N)	140	1.62	AGU(S)	19	0.39
AUC(I)	64	0.31	ACC(T)	21	0.53	AAC(N)	33	0.38	AGC(S)	0	0
AUA(M)	325	1.83	ACA(T)	95	2.41	AAA(K)	146	1.82	AGA(S)	73	1.51
AUG(M)	30	0.17	ACG(T)	2	0.05	AAG(K)	14	0.17	AGG(S)	11	0.23
GUU(V)	73	1.95	GCU(A)	28	1.44	GAU(D)	51	1.5	GGU(G)	84	1.95
GUC(V)	3	0.08	GCC(A)	5	0.26	GAC(D)	17	0.5	GGC(G)	4	0.09
GUA(V)	69	1.84	GCA(A)	44	2.26	GAA(E)	71	1.87	GGA(G)	76	1.77
GUG(V)	5	0.13	GCG(A)	1	0.05	GAG(E)	5	0.13	GGG(G)	8	0.19
Average# codons=3653
L: Peltonotellus sp.
Codon	Count	RSCU	Codon	Count	RSCU	Codon	Count	RSCU	Codon	Count	RSCU
UUU(F)	436	1.83	UCU(S)	105	2.28	UAU(Y)	126	1.76	UGU(C)	50	1.89
UUC(F)	41	0.17	UCC(S)	5	0.11	UAC(Y)	17	0.24	UGC(C)	3	0.11
UUA(L)	308	4.16	UCA(S)	171	3.71	UAA(*)	9	1.8	UGA(W)	78	1.9
UUG(L)	51	0.69	UCG(S)	1	0.02	UAG(*)	1	0.2	UGG(W)	4	0.1
CUU(L)	31	0.42	CCU(P)	39	1.28	CAU(H)	45	1.43	CGU(R)	22	1.83
CUC(L)	1	0.01	CCC(P)	10	0.33	CAC(H)	18	0.57	CGC(R)	0	0
CUA(L)	49	0.66	CCA(P)	73	2.39	CAA(Q)	42	1.68	CGA(R)	25	2.08
CUG(L)	4	0.05	CCG(P)	0	0	CAG(Q)	8	0.32	CGG(R)	1	0.08
AUU(I)	357	1.76	ACU(T)	42	0.97	AAU(N)	140	1.53	AGU(S)	16	0.35
AUC(I)	49	0.24	ACC(T)	8	0.18	AAC(N)	43	0.47	AGC(S)	5	0.11
AUA(M)	298	1.87	ACA(T)	121	2.78	AAA(K)	160	1.83	AGA(S)	62	1.34
AUG(M)	21	0.13	ACG(T)	3	0.07	AAG(K)	15	0.17	AGG(S)	4	0.09
GUU(V)	79	2.31	GCU(A)	19	1.09	GAU(D)	53	1.61	GGU(G)	75	1.7
GUC(V)	1	0.03	GCC(A)	4	0.23	GAC(D)	13	0.39	GGC(G)	3	0.07
GUA(V)	52	1.52	GCA(A)	46	2.63	GAA(E)	73	1.78	GGA(G)	92	2.09
GUG(V)	5	0.15	GCG(A)	1	0.06	GAG(E)	9	0.22	GGG(G)	6	0.14
Average# codons=3649

## Sheet: TableS6
Table S6 Summary of multiple alignments of tRNA genes in the mitogenomes of 12 Caliscelidae species.
tRNA	Amino acid	Total length	Identical positions	%INUC
trnA	Alanine	70	44	62.86
trnC	Cysteine	74	25	33.78
trnD	Aspartate	74	33	44.59
trnE	Glutamate	70	51	72.86
trnF	Phenylalanine	74	34	45.95
trnG	Glycine	68	41	60.29
trnH	Histidine	69	25	36.23
trnI	Isoleucine	69	43	62.32
trnK	Lysine	73	58	79.45
trnL1	Leucine(UAG)	68	44	64.71
trnL2	Leucine(UAA)	69	52	75.36
trnM	Methionine	72	47	65.28
trnN	Asparagine	71	43	60.56
trnP	Proline	69	41	59.42
trnQ	Glutamine	70	40	57.14
trnR	Arginine	76	31	40.79
trnS1	Serine(GCU)	63	41	65.08
trnS2	Serine(UGA)	72	35	48.61
trnT	Threonine	74	38	51.35
trnV	Valine	61	28	45.9
trnW	Tryptophan	71	45	63.38
trnY	Tyrosine	66	37	56.06

## Sheet: TableS7
Table S7 Nucleotide diversity (A) and the ratio of Ka/Ks (B) of PCGs from 16 reported Caliscelidae mitogenomes.
A Nucleotide diversity				B The ratio of Ka/Ks
Genes	Pi			Genes	Ka	Ks	Ka/Ks
atp6	0.21437			apt6	0.176492	0.658278	0.268111
atp8	0.33767			apt8	0.446053	0.606917	0.73495
cox1	0.16377			cox1	0.0742658	0.802536	0.092539
cox2	0.17954			cox2	0.127955	0.662261	0.193209
cox3	0.20063			cox3	0.156184	0.642552	0.243068
cytb	0.1772			cob	0.102879	0.775876	0.132597
nd1	0.16539			nd1	0.135139	0.433182	0.311969
nd2	0.26571			nd2	0.290529	0.551356	0.526936
nd3	0.22894			nd3	0.208636	0.631016	0.330635
nd4	0.21377			nd4	0.205835	0.476686	0.431804
nd4l	0.22528			nd4l	0.231959	0.471362	0.492104
nd5	0.19024			nd5	0.181441	0.399443	0.454235
nd6	0.27125			nd6	0.297989	0.549819	0.541977
